# Supplementary material for: P450BM3 fused to phosphite dehydrogenase allows phosphite-driven selective oxidations
Source: PubMed Central journal article supplement (PMC5320008; doi:10.1007/s00253-016-7993-7), 2016-11-29
Supplement: 253_2016_7993_MOESM1_ESM.pdf [file 253_2016_7993_MOESM1_ESM.pdf]

**Applied Microbiology and Biotechnology**

## **P450<sub>BM3</sub> fused to phosphite dehydrogenase allows phosphite-driven selective oxidations**

Nina Beyer<sup>a</sup>, Justyna K. Kulig<sup>b</sup>, Anette Bartsch<sup>a</sup>, Martin A. Hayes<sup>b</sup>, Dick B. Janssen<sup>a</sup>, Marco W. Fraaije<sup>a</sup>

<sup>a</sup> Department of Biochemistry, University of Groningen, Groningen, The Netherlands  
[phone: +31 50 363 4345; e-mail: m.w.fraaije@rug.nl]

<sup>b</sup> Cardiovascular and Metabolic Diseases, DMPK, Innovative Medicines and Early Development Biotech Unit, AstraZeneca, Sweden

### **Corresponding author:**

Marco W. Fraaije, Department of Biochemistry, Groningen Biomolecular Sciences and Biotechnology Institute  
University of Groningen, Nijenborgh 4, 9747 AG Groningen, The Netherlands  
Tel. 0031-50-3634345, e-mail: m.w.fraaije@rug.nl

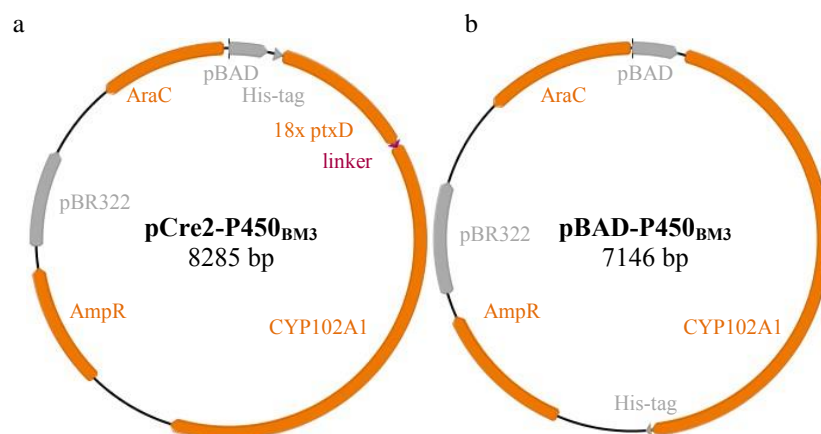

**Fig S1** Plasmid maps of the a) synthetic construct pCre2-P450<sub>BM3</sub> for the production of the fully self-sufficient PTDH-P450<sub>BM3</sub>, in comparison to b) pBAD-P450<sub>BM3</sub> as expression vector for P450<sub>BM3</sub> WT in *E. coli*.

**Table S1** Qualitative analysis of the level of PTDH-P450<sub>BM3</sub> in the cell free extract after expression from a pBAD vector in different *E. coli* strains under the same conditions, determined by CO-difference spectra.

| <i>E. coli</i> strain | Expression level<br>[mg/50 mL culture] |
|-----------------------|----------------------------------------|
| Top10                 | 4.7                                    |
| BL21 DE3              | 0.0                                    |
| C43                   | 0.8                                    |
| SHuffle               | 0.7                                    |

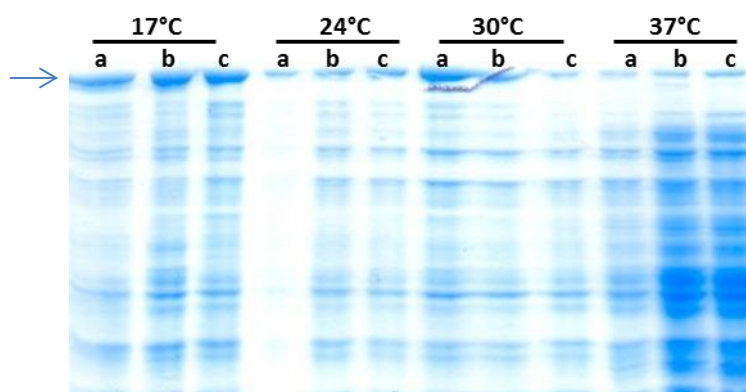

**Fig S2** Expression optimization of PTDH-P450<sub>BM3</sub> by varying expression temperature and varying arabinose concentration. Soluble fraction obtained after expression in *E. coli* TOP10 at different temperatures and arabinose concentrations a = 0.002%, b = 0.02% and c = 0.2%. Proteins were separated in a 12% SDS-Page gel. The protein band of PTDH-P450<sub>BM3</sub> is highlighted with an arrow.

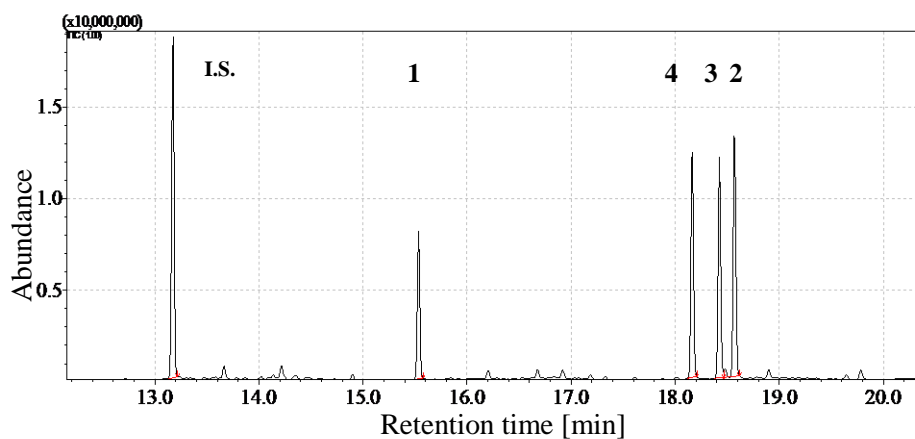

**Fig S3** Representative chromatogram of TMS-derivatized lauric acid and the hydroxylated products from conversions with P450<sub>BM3</sub>. For quantitative comparison all peak areas were normalized relative to the peak area of capric acid, the internal standard (I.S.). The response factor of the monohydroxylated TMS-derivatized products was estimated from TMS-derivatized 12-hydroxylauric acid.

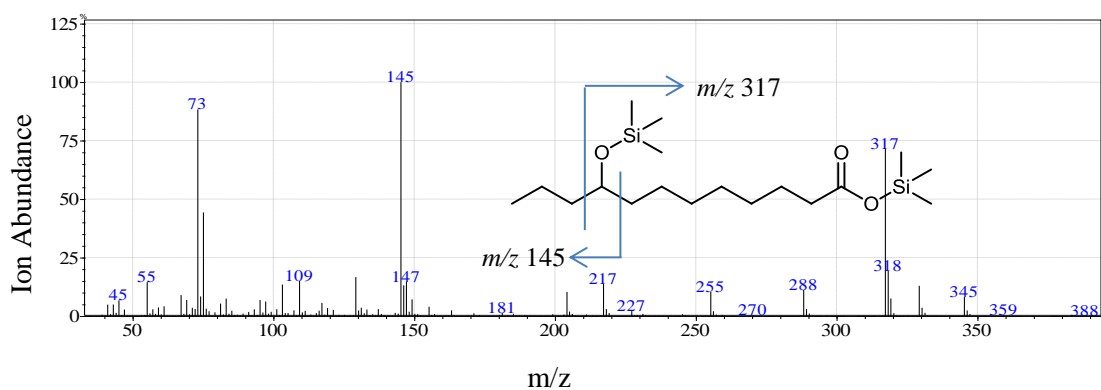

**Fig S4** Representative fragmentation spectra for TMS derivatized 9-hydroxylauric acid. MS fragments correspond to the GC-MS peak at 18.1 min (TMS derivatized 4).
